# Supplementary figures and images for: Outcomes of a Peer Mentor Intervention for Persons With Recurrent Psychiatric Hospitalization
Source: Atypon-hosted journal article supplement (doi:10.1176/appi.ps.201600478), 2018-04-16

**CONSORT diagram**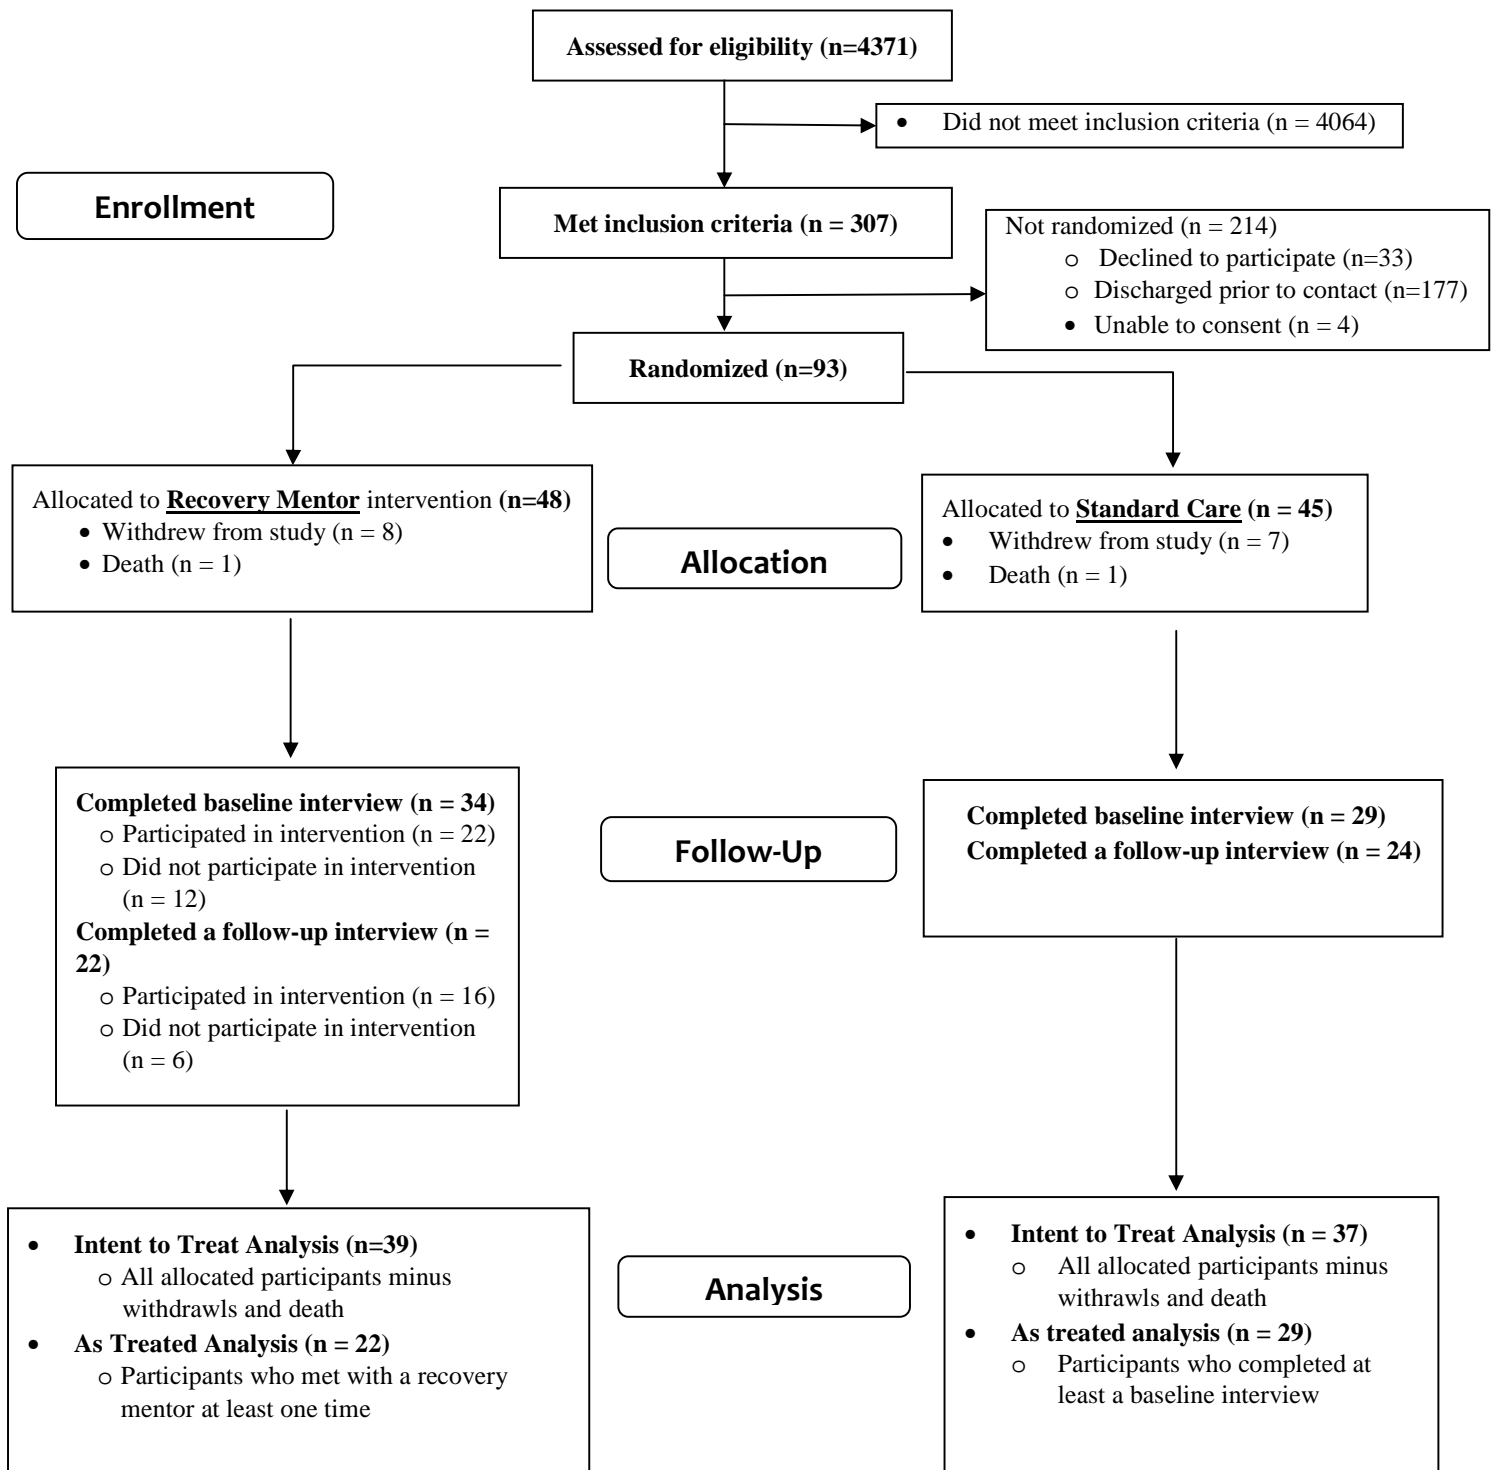

Supplement: appi.ps.201600478.ds001.pdf [file appi.ps.201600478.ds001.pdf]
